# Supplementary material for: Glycogen Synthase Kinase-3β Mediates Proinflammatory Cytokine Secretion and Adipogenesis in Orbital Fibroblasts from Patients with Graves’ Orbitopathy
Source: PubMed Central journal article supplement — Invest Ophthalmol Vis Sci. 2020 Jul 31;61(8):51. doi: 10.1167/iovs.61.8.51 (PMC7426624; doi:10.1167/iovs.61.8.51), 2020-07-31
Supplement: iovs-61-8-51_s003.pdf [file iovs-61-8-51_s003.pdf]

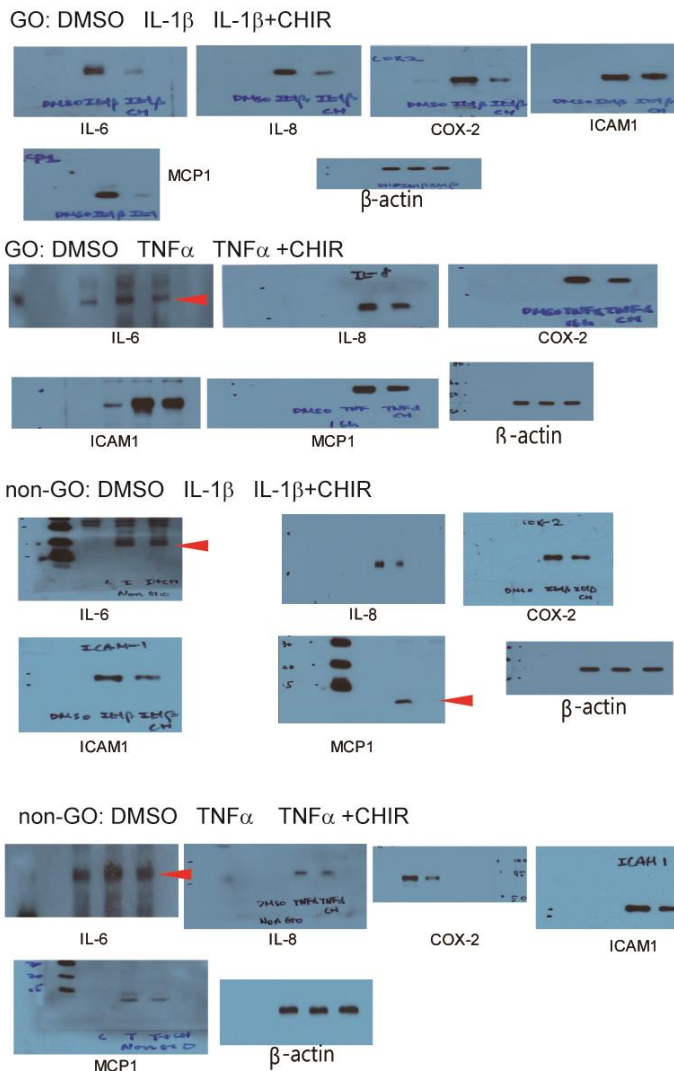

**Supplementary figure 3. Full-length western blot of Figure 5.** The red arrowheads are drawn to indicate the bands for IL-6 and MCP-1. The first section captioned ‘GO: DMSO, IL-1 $\beta$ , IL-1 $\beta$ +CHIR’ corresponds to the first column of blot images of Figure 5A. The bands within each full length image are in the order of treatment with DMSO, IL-1 $\beta$  and IL-1 $\beta$  with CHIR. The second section captioned ‘GO: DMSO TNF- $\alpha$  TNF- $\alpha$  +CHIR’ are full length immunoblots of the second column of Figure 5A. The third section captioned ‘non-GO: DMSO IL-1 $\beta$  IL-1 $\beta$ +CHIR’ corresponds to the third column, and the fourth section captioned ‘non-GO DMSO TNF- $\alpha$  TNF- $\alpha$ +CHIR’ corresponds to the fourth column.
